# Supplementary material for: Giant Stark effect assisted radio frequency energy harvesting using atomically thin earth-abundant iron sulphide (FeS2)
Source: Royal Society of Chemistry journal article supplement (doi:10.1039/d3ta07906f), 2024-01-01
Supplement: d3ta07906f1.pdf [file d3ta07906f1.pdf]

## ARTICLE

### Giant Stark Effect Assisted Radio Frequency Energy Harvesting Using Atomically Thin Earth-Abundant Iron Sulphide ( $\text{FeS}_2$ )

Karthik R,<sup>a</sup> Appu Kumar Singh,<sup>a</sup> Shreyasi Das,<sup>b</sup> Suman Sarkar,<sup>c</sup> Tarun Kumar Kundu,<sup>a</sup> Swastik Kar,<sup>d</sup> P R Sreeram,<sup>\*a</sup> and Chandra Sekhar Tiwary<sup>\*a</sup>

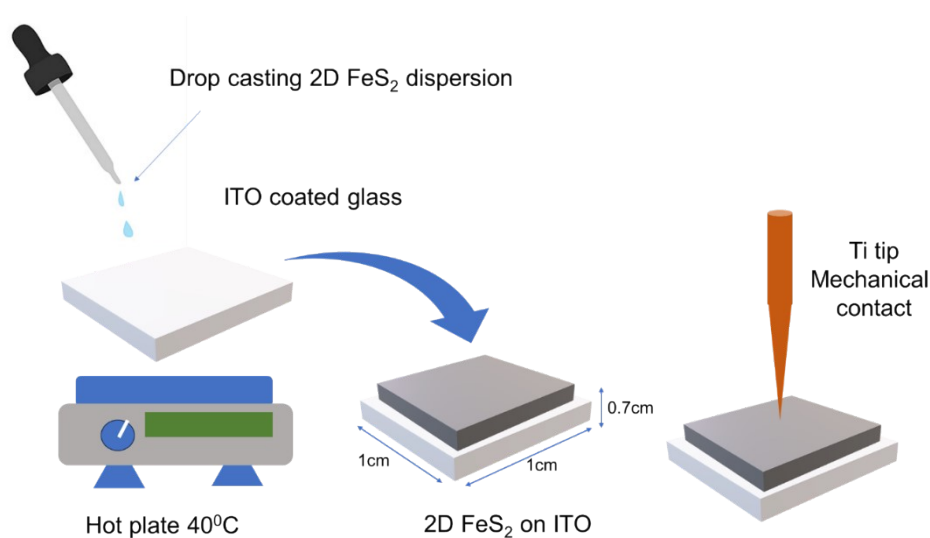

Figure S1: Schematic representation of device fabrication using the drop-casting method

<sup>a</sup> Department of Metallurgical and Materials Engineering, Indian Institute of Technology Kharagpur, West Bengal 721302, India

<sup>b</sup> School of Nano Science and Technology, Indian Institute of Technology Kharagpur, West Bengal 721302, India

<sup>c</sup> Department of Materials Engineering, Indian Institute of Technology Jammu, Jammu 181221, India

<sup>d</sup> Department of Physics and Chemical Engineering, Northeastern University, Boston, Massachusetts 02115, United States

\*[sreerampunam@metal.iitkgp.ac.in](mailto:sreerampunam@metal.iitkgp.ac.in) (P R Sreeram),

[chandra.tiwary@metal.iitkgp.ac.in](mailto:chandra.tiwary@metal.iitkgp.ac.in) (C. S. Tiwary)

Electronic Supplementary Information (ESI) available:

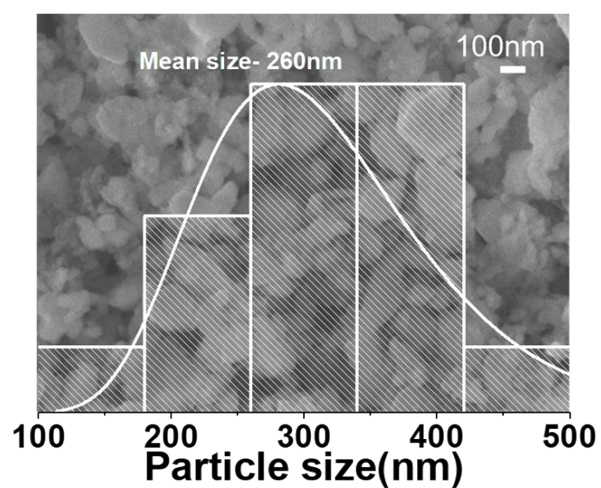

Figure S2- FESEM image of 2D FeS<sub>2</sub> coating on ITO-coated glass substrate

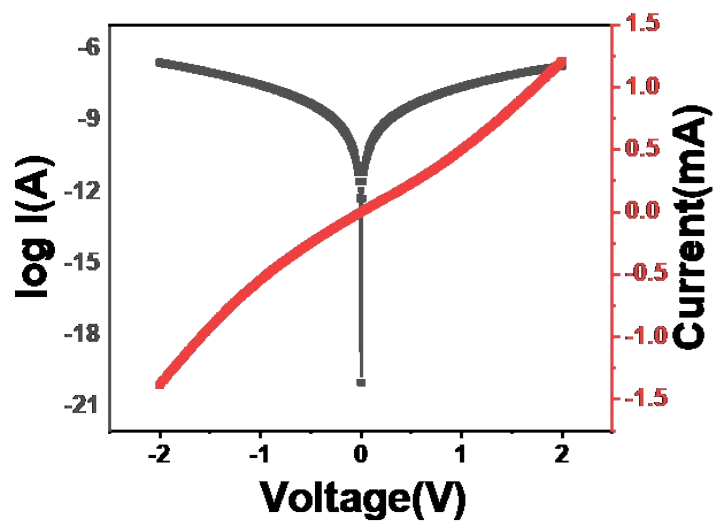

Figure S3- Current-voltage characteristics of bulk FeS<sub>2</sub>

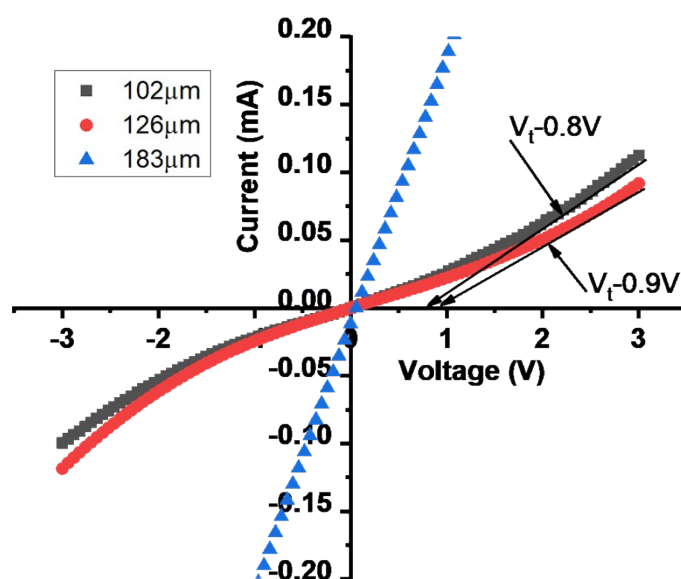

Figure S4- Voltage current characteristics of Ti/2DFeS<sub>2</sub>/ITO device with varying thickness of FeS<sub>2</sub> coating

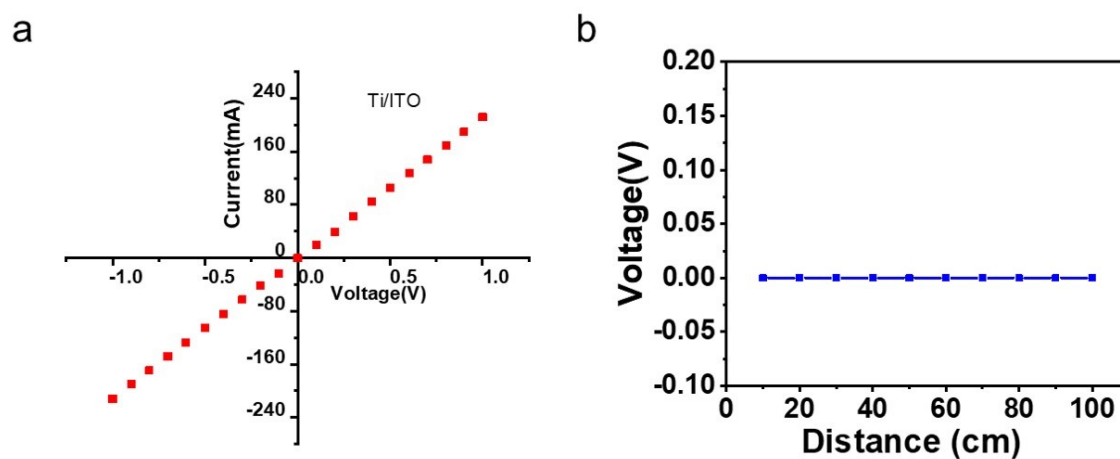

Figure S5- Voltage- current characteristics of Ti/ITO configuration and (b) Voltage versus distance measurements at 150MHz.
